# Supplementary material
Source: publisher figshare collection journal article supplement (https://karger.figshare.com/articles/dataset/_/5918569)
Supplement: Supplementary file 1 [file 1]

Supplementary table 2. Classification results using the diagnostic tool with all possible combinations of the MRI methods.

| METHODS USED             | FTLD     | AD       | LBD      | SMC      |
|--------------------------|----------|----------|----------|----------|
| VOL+TBM                  | 12 (24%) | 16 (32%) | 17 (34%) | 5 (10%)  |
| VOL+VBM                  | 30 (60%) | 2 (4%)   | 16 (32%) | 2 (4%)   |
| VOL+WMH                  | 18 (36%) | 12 (24%) | 16 (32%) | 4 (8%)   |
| VOL+GRADING              | 18 (36%) | 6 (12%)  | 20 (40%) | 6 (12%)  |
| VOL+MANIFOLD             | 4 (8%)   | 18 (36%) | 23 (46%) | 5 (10%)  |
| TBM+VBM                  | 23 (46%) | 7 (14%)  | 19 (38%) | 1 (2%)   |
| TBM+WMH                  | 9 (18%)  | 18 (36%) | 18 (36%) | 5 (10%)  |
| TBM+GRADING              | 13 (26%) | 9 (18%)  | 18 (36%) | 10 (20%) |
| TBM+MANIFOLD             | 4 (8%)   | 18 (36%) | 24 (48%) | 4 (8%)   |
| VBM+WMH                  | 27 (54%) | 5 (10%)  | 18 (36%) | 0 %      |
| VBM+GRADING              | 28 (56%) | 5 (10%)  | 15 (30%) | 2 (4%)   |
| VBM+MANIFOLD             | 15 (30%) | 11 (22%) | 23 (46%) | 1 (2%)   |
| WMH+GRADING              | 16 (32%) | 5 (10%)  | 15 (30%) | 14 (28%) |
| WMH+MANIFOLD             | 5 (10%)  | 15 (30%) | 25 (50%) | 5 (10%)  |
| GRADING+MANIFOLD         | 5 (10%)  | 10 (20%) | 24 (48%) | 11 (22%) |
| VOL+TBM+VBM              | 25 (50%) | 2 (4%)   | 21 (42%) | 2 (4%)   |
| VOL+TBM+WMH              | 13 (26%) | 15 (30%) | 19 (38%) | 3 (6%)   |
| VOL+TBM+GRADING          | 17 (34%) | 9 (18%)  | 17 (34%) | 7 (14%)  |
| VOL+TBM+MANIFOLD         | 7 (14%)  | 17 (34%) | 23 (46%) | 3 (6%)   |
| VOL+VBM+WMH              | 29 (58%) | 2 (4%)   | 18 (36%) | 1 (2%)   |
| VOL+VBM+GRADING          | 29 (58%) | 2 (4%)   | 17 (34%) | 2 (4%)   |
| VOL+VBM+MANIFOLD         | 21 (42%) | 6 (12%)  | 23 (46%) | 0 %      |
| VOL+WMH+GRADING          | 19 (38%) | 6 (12%)  | 18 (36%) | 7 (14%)  |
| VOL+WMH+MANIFOLD         | 7 (14%)  | 16 (32%) | 20 (40%) | 7 (14%)  |
| VOL+GRADING+MANIFOLD     | 12 (24%) | 7 (14%)  | 23 (46%) | 8 (16%)  |
| TBM+VBM+WMH              | 22 (44%) | 6 (12%)  | 22 (44%) | 0 %      |
| TBM+VBM+GRADING          | 23 (46%) | 6 (12%)  | 18 (36%) | 3 (6%)   |
| TBM+VBM+MANIFOLD         | 13 (26%) | 11 (22%) | 25 (50%) | 1 (2%)   |
| TBM+WMH+GRADING          | 13 (26%) | 8 (16%)  | 22 (44%) | 7 (14%)  |
| TBM+WMH+MANIFOLD         | 5 (10%)  | 16 (32%) | 22 (44%) | 7 (14%)  |
| TBM+GRADING+MANIFOLD     | 8 (16%)  | 11 (22%) | 24 (48%) | 7 (14%)  |
| VBM+WMH+GRADING          | 25 (50%) | 7 (14%)  | 15 (30%) | 3 (6%)   |
| VBM+WMH+MANIFOLD         | 13 (26%) | 12 (24%) | 24 (48%) | 1 (2%)   |
| VBM+GRADING+MANIFOLD     | 16 (32%) | 8 (16%)  | 22 (44%) | 4 (8%)   |
| WMH+GRADING+MANIFOLD     | 6 (12%)  | 9 (18%)  | 26 (52%) | 9 (18%)  |
| VOL+TBM+VBM+WMH          | 27 (54%) | 3 (6%)   | 19 (38%) | 1 (2%)   |
| VOL+TBM+VBM+GRADING      | 23 (46%) | 4 (8%)   | 20 (40%) | 3 (6%)   |
| VOL+TBM+VBM+MANIFOLD     | 17 (34%) | 9 (18%)  | 24 (48%) | 0 %      |
| VOL+TBM+WMH+GRADING      | 17 (34%) | 9 (18%)  | 19 (38%) | 5 (10%)  |
| VOL+TBM+WMH+MANIFOLD     | 7 (14%)  | 18 (36%) | 21 (42%) | 4 (8%)   |
| VOL+TBM+GRADING+MANIFOLD | 11 (22%) | 10 (20%) | 25 (50%) | 4 (8%)   |
| VOL+VBM+WMH+GRADING      | 28 (56%) | 2 (4%)   | 19 (38%) | 1 (2%)   |
| VOL+VBM+WMH+MANIFOLD     | 20 (40%) | 8 (16%)  | 21 (42%) | 1 (2%)   |
| VOL+VBM+GRADING+MANIFOLD | 18 (36%) | 8 (16%)  | 22 (44%) | 2 (4%)   |
| VOL+WMH+GRADING+MANIFOLD | 12 (24%) | 7 (14%)  | 23 (46%) | 8 (16%)  |
| TBM+VBM+WMH+GRADING      | 21 (42%) | 8 (16%)  | 18 (36%) | 3 (6%)   |
| TBM+VBM+WMH+MANIFOLD     | 12 (24%) | 12 (24%) | 24 (48%) | 2 (4%)   |

|                                         |          |          |          |         |
|-----------------------------------------|----------|----------|----------|---------|
| <b>TBM+VBM+GRADING+MANIFOLD</b>         | 13 (26%) | 9 (18%)  | 26 (52%) | 2 (4%)  |
| <b>TBM+WMH+GRADING+MANIFOLD</b>         | 9 (18%)  | 10 (20%) | 24 (48%) | 7 (14%) |
| <b>VBM+WMH+GRADING+MANIFOLD</b>         | 15 (30%) | 7 (14%)  | 20 (40%) | 8 (16%) |
| <b>VOL+TBM+VBM+WMH+GRADING</b>          | 24 (48%) | 4 (8%)   | 21 (42%) | 1 (2%)  |
| <b>VOL+TBM+VBM+WMH+MANIFOLD</b>         | 16 (32%) | 10 (20%) | 23 (46%) | 1 (2%)  |
| <b>VOL+TBM+VBM+GRADING+MANIFOLD</b>     | 17 (34%) | 8 (16%)  | 23 (46%) | 2 (4%)  |
| <b>VOL+TBM+WMH+GRADING+MANIFOLD</b>     | 12 (24%) | 9 (18%)  | 22 (44%) | 7 (14%) |
| <b>VOL+VBM+WMH+GRADING+MANIFOLD</b>     | 21 (42%) | 5 (10%)  | 21 (42%) | 3 (6%)  |
| <b>TBM+VBM+WMH+GRADING+MANIFOLD</b>     | 12 (24%) | 9 (18%)  | 24 (48%) | 5 (10%) |
| <b>VOL+TBM+VBM+WMH+GRADING+MANIFOLD</b> | 16 (32%) | 9 (18%)  | 22 (44%) | 3 (6%)  |

*Supplementary table 2.* Classification results using the diagnostic tool with all possible combinations of the MRI methods. (VOL=volumetry, TBM=Tensor-based morphometry, VBM= Voxel-based morphometry, WMH=white matter hyperintensities, Manifold=manifold-based learning).
