# Supplementary material
Source: publisher figshare collection journal article supplement (https://karger.figshare.com/articles/dataset/_/5918569)
Supplement: Supplementary file 2 [file 1]

*Supplementary table 1.* Reference data.

|              | <b>VUMC</b> | <b>UPG</b> | <b>RH</b> | <b>UEF</b> | <b>ADNI</b> | <b>TOTAL</b> |
|--------------|-------------|------------|-----------|------------|-------------|--------------|
| <b>SMC</b>   | 118         | 14         | 12        | 0          | 215         | 359          |
| <b>AD</b>    | 222         | 24         | 103       | 0          | 188         | 537          |
| <b>FTLD</b>  | 89          | 5          | 23        | 37         | 0           | 154          |
| <b>LBD</b>   | 47          | 1          | 13        | 0          | 0           | 61           |
| <b>TOTAL</b> | 476         | 44         | 151       | 37         | 403         | 1111         |

*Supplementary table 1.* Reference data. VUMC = VU medical center (The Netherlands), UPG = The Università degli Studi di Perugia, RH = Rigshospitalet (Denmark), UEF = University of Eastern Finland, ADNI = Alzheimer's Disease Neuroimaging Initiative
